# Supplementary material
Source: PubMed Central journal article supplement (PMC6990748)
Supplement: jamasurg-155-e195472-s001.pdf [file jamasurg-155-e195472-s001.pdf]

## Supplementary Online Content

Massie AB, Holscher CM, Henderson ML, et al. Association of early postdonation renal function with subsequent risk of end-stage renal disease in living kidney donors. *JAMA Surg*. Published online January 22, 2020. doi:10.1001/jamasurg.2019.5472

**eTable.** Characteristics of donors by ESRD status.

This supplementary material has been provided by the authors to give readers additional information about their work.

**eTable. Characteristics of donors by ESRD status.**

Donors who experienced ESRD had comparable pre-donation eGFR compared to those who did not (median 96.5 vs 97.6 mL/min/1.7 m<sup>3</sup>), but lower 6-month post-donation eGFR (58.3 vs 63.1).

| <b>Characteristic</b>               | <b>No ESRD</b><br>N=71,468 | <b>ESRD</b><br>N=75 |
|-------------------------------------|----------------------------|---------------------|
| Median (IQR) age at donation        | 42 (33-51)                 | 41 (33-51)          |
| Median (IQR) BMI at donation        | 26.6 (23.7-29.6)           | 28.5 (24.4-31.0)    |
| Pre-donation eGFR                   | 97.6 (84.2-109.9)          | 96.1 (81.6-106.9)   |
| 6m post-donation eGFR               | 63.0 (54.1-73.9)           | 58.5 (49.7-66.0)    |
| % male                              | 38.5%                      | 52.0%               |
| % black                             | 10.9%                      | 22.7%               |
| % first-degree related to recipient | 47.2%                      | 68.0%               |
